# Supplementary material for: Impact of Early versus Late Initiation of Renal Replacement Therapy in Patients with Cardiac Surgery-Associated Acute Kidney Injury: Meta-Analysis with Trial Sequential Analysis of Randomized Controlled Trials
Source: Biomed Res Int. 2018 Dec 18;2018:6942829. doi: 10.1155/2018/6942829 (PMC6312615; doi:10.1155/2018/6942829)
Supplement: Supplementary Materials — Supplementary Table: results of sensitivity and subgroup analysis based on different standards. [file 6942829.f1.zip]

Archive with 2 entries (2 files):
- PRISMA Checklist.doc
- Supplementary Table.docx
